# Supplementary material for: Evaluation of Toxicity of Crude Phlorotannins and Phloroglucinol Using Different Model Organisms
Source: MDPI journal article supplement (doi:10.3390/toxins14050312), 2022-04-28
Supplement: s1 [file s1]

## Supplementary Materials: Evaluation of Toxicity of Crude Phlorotannins and Phloroglucinol Using Different Model Organisms

Dicky Harwanto, Bertoka Fajar Surya Perwira Negara, Gabriel Tirtawijaya, Maria Dyah Nur Meinita and Jae-Suk Choi

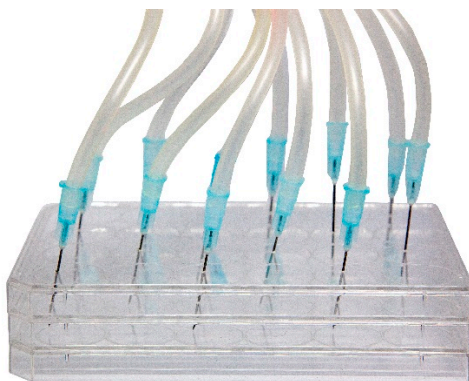

**Figure S1.** Design of the system used to assess the larvicidal effect of concentrations of phlorotannin and phloroglucinol on *Artemia salina* nauplii and *Daphnia magna* neonates.
